# Supplementary material for: Production of flavorful alcohols from woods and possible applications for wood brews and liquors
Source: Royal Society of Chemistry journal article supplement (doi:10.1039/d0ra06807a), 2020-01-01
Supplement: d0ra06807a1.pdf [file d0ra06807a1.pdf]

Table S1 Components of Japanese cedar, Cherry and Birch wood

|                                     | Wood components (wt%) |               |                |                 |
|-------------------------------------|-----------------------|---------------|----------------|-----------------|
|                                     | Extractives           | Klason Lignin | Holo-cellulose | alpha-cellulose |
| <i>Cryptomeria japonica</i> (Cedar) | 3.59 ±0.03            | 32.59 ±0.06   | 65.20 ±2.00    | 44.07 ±1.08     |
| <i>Cerasus x yedoensis</i> (Cherry) | 3.14 ±0.09            | 23.43 ±1.04   | 74.01 ±1.46    | 43.18 ±0.96     |
| <i>Betula platyphylla</i> (Birch)   | 2.52 ±0.07            | 20.84 ±0.14   | 75.50 ±0.70    | 45.95 ±1.09     |

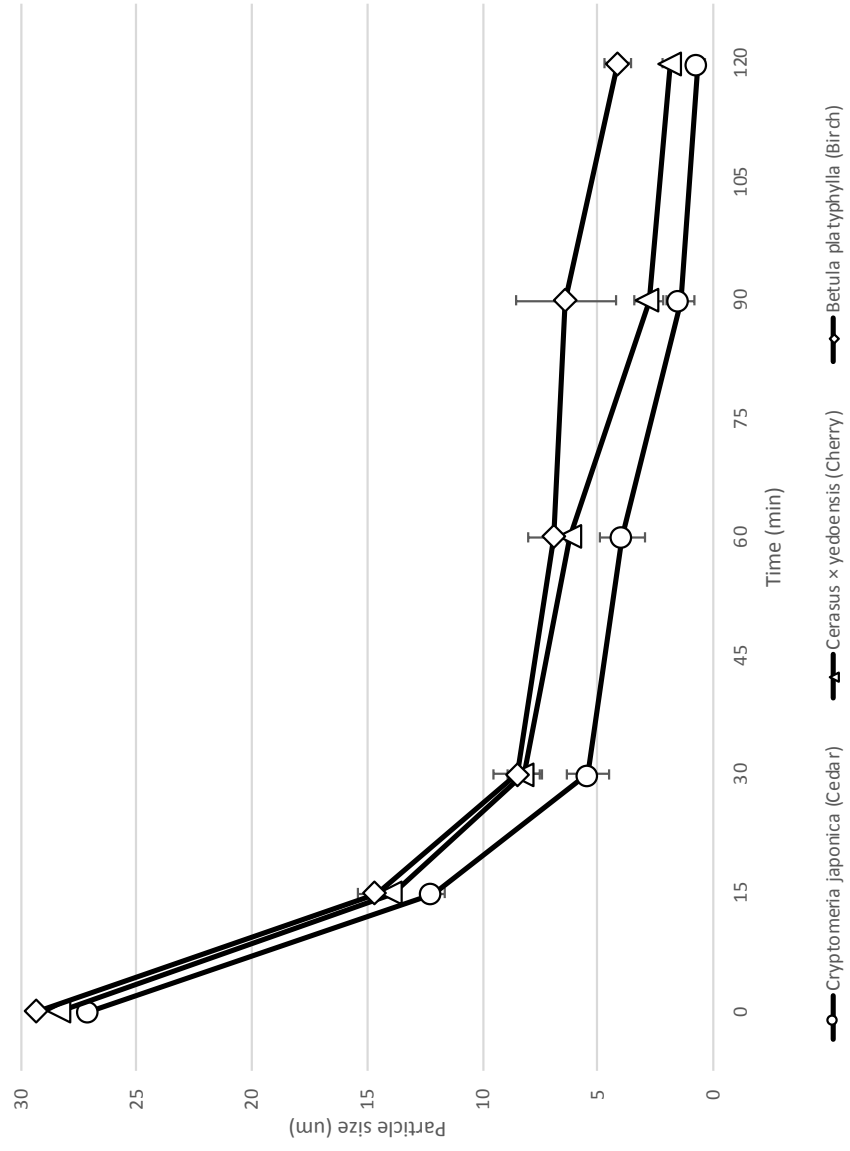

Fig.S1 Time course particle size of wood with bead mill treatment.

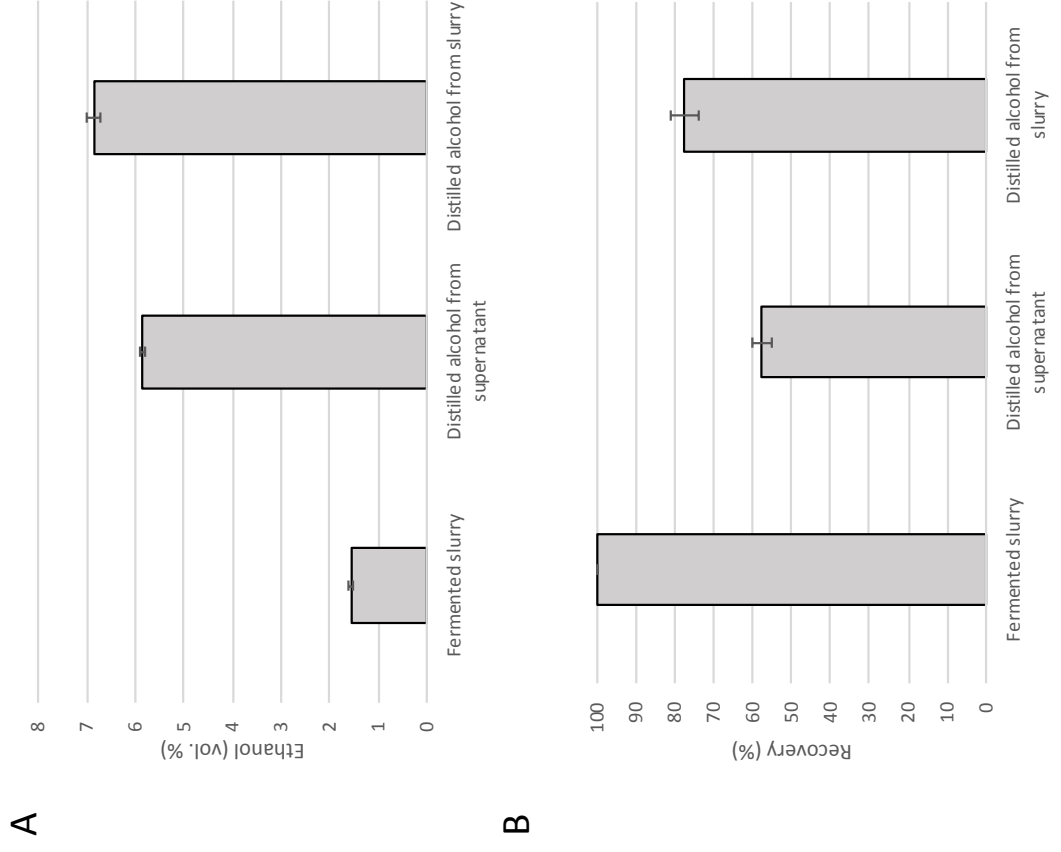

Fig.S2 Alcohol concentrations with distillation processes and recovery of alcohol from fermented slurry.

4  
5

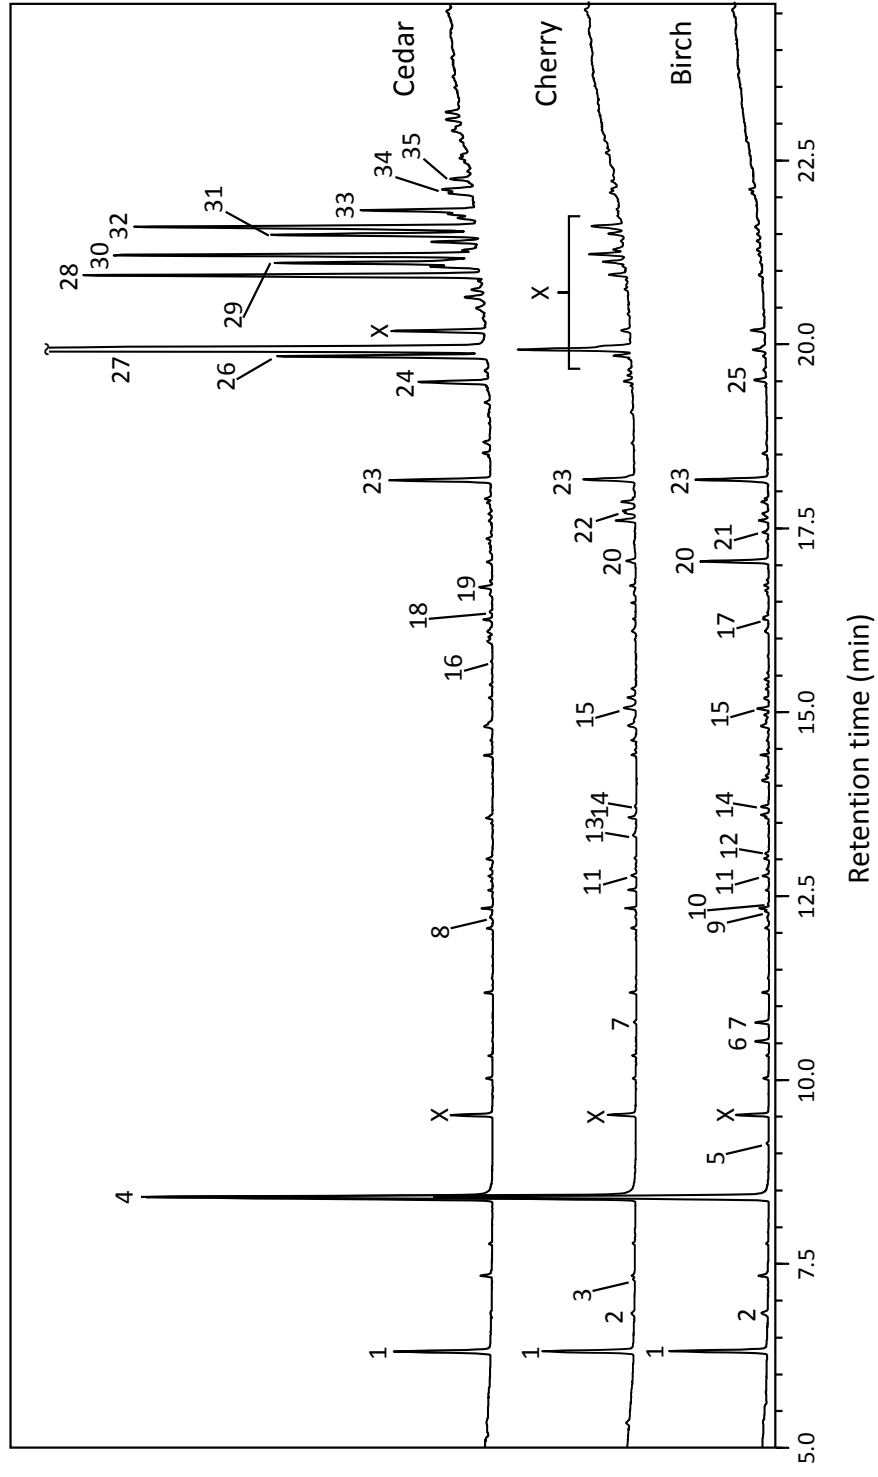

Fig. S3 Total ion-chromatograms of SPME-GC-MS analysis of Cedar, Cherry and Birch distillates.
